1 **A community-based mentoring scheme for pregnant and parenting**  
2 **adolescents in Sierra Leone: protocol for a hybrid pilot cluster randomised**  
3 **controlled trial**

4  
5 Fernandez Turienzo C<sup>1\*</sup>, Kamara M<sup>2\*</sup>, November L<sup>1\*</sup>, Kamara P<sup>3</sup>, Kingsford AM<sup>4</sup>, Ridout A<sup>1</sup> Thomas  
6 S<sup>4</sup>, Seed PT<sup>1</sup>, Shennan AH<sup>1</sup>, Sandall J<sup>1#</sup>, Williams PT<sup>3#</sup>

7  
8  
9 <sup>1</sup>Department of Women and Children’s Health, Faculty of Life Sciences & Medicine, King’s College  
10 London, London, United Kingdom

11 <sup>2</sup>University of Sierra Leone, Freetown, Sierra Leone

12 <sup>3</sup>Lifeline Nehemiah Projects, Freetown, Sierra Leone

13 <sup>4</sup>Welbodi Partnership, Freetown, Sierra Leone

14 \*Joint first authors

15 #Joint last authors

16  
17  
18  
19  
20  
21  
22  
23  
24  
25  
26  
27  
28  
29 Corresponding author: Dr Cristina Fernandez Turienzo, Department of Women & Children’s Health,  
30 School of Life Course and Population Sciences, Faculty of Life Sciences & Medicine, King’s College  
31 London, Westminster Bridge Road, London, SE1 7EH, United Kingdom;  
32 [cristina.fernandez\\_turienzo@kcl.ac.uk](mailto:cristina.fernandez_turienzo@kcl.ac.uk)

33  
34 **NOTE: This preprint reports new research that has not been certified by peer review and should not be used to guide clinical practice.**  
35

## 36 **Abstract**

### 37 **Background**

38 Sierra Leone has a very high maternal mortality rate, and this burden falls heavily on adolescents, a  
39 particularly vulnerable group; this is usually driven by poverty, lack of education and employment  
40 opportunities. In 2017, a local grassroots organisation, Lifeline Nehemiah Projects, developed a  
41 community-based mentoring intervention '2YoungLives' (2YLs) for adolescent girls in Eastern  
42 Freetown. We aim to formally assess the feasibility and implementation of the 2YL mentorship  
43 scheme in new communities in Sierra Leone.

44

### 45 **Methods**

46 A hybrid type 2 pilot cluster randomised controlled trial of the 2YL mentoring scheme in urban and  
47 rural communities living around twelve peripheral health units (PHU) across five districts in Sierra  
48 Leone. Clusters will be matched into pairs and randomisation will be determined by computer-  
49 generated random numbers via a secure web-based system hosted by MedSciNet. All under-  
50 eighteen adolescents identified as pregnant in the community and/or the PHU are included.  
51 Feasibility (recruitment, retention, and attrition rates; data collection and completeness; sample  
52 calculation) and primary clinical outcome data (composite of maternal deaths, stillbirths, neonatal  
53 deaths) will be collected. A mixed-methods process evaluation will explore implementation  
54 outcomes, mechanisms of change, contextual factors, experiences of care, and health and wellbeing.  
55 A concurrent cost-consequence analysis will be undertaken. Main trial analysis will be pragmatic, by  
56 intention to treat, and a complementary per protocol analysis will also be included.

57

### 58 **Discussion**

59 Improving health and wellbeing for adolescent girls (including sexual and reproductive health)  
60 remains a top priority in Sierra Leone indicated by several government policies targeted to this group,  
61 in which maternal and infant mortality are still persistently high. Supporting these girls and facilitating  
62 their wellbeing is imperative, along with sensitisation of communities, strengthening of youth  
63 friendly services and collaboration with stakeholders at all levels (government, regional, community,  
64 family). We believe 2YL supports the global holistic agenda to integrate and implement interventions  
65 across health, education, and social systems in order to protect, nurture, and support the health and  
66 development potential of every adolescent girl, and thus become a model of good practice for  
67 adolescent pregnancy, to be adopted more widely in Sierra Leone and elsewhere.

68

### 69 **Trial registration**

70 ISRCTN registry ISRCTN32414369. Prospectively registered on 14/03/2022.

71

72

73 **Keywords**

74 Community-based interventions; mentoring; pregnant and parenting adolescents; Sierra Leone

75

76

77 **Introduction**

78 Maternal mortality rate in Sierra Leone remains very high despite recent improvements (717 deaths  
79 per 100 000 livebirths in 2019) [1] with adolescent pregnancy a leading cause of death for mothers;  
80 adolescent mothers are 40-60% more likely to die during childbirth [2,3]. A household survey  
81 conducted post-Ebola in 2015 indicated a maternal death rate of 1 in 10 for under-18-year-olds in a  
82 poor suburb of Eastern Freetown. A subsequent study examined the causes of this high incidence of  
83 maternal death in adolescents and highlighted intersecting health and socio-economic vulnerabilities  
84 [4]. Among key findings were that pregnant adolescents were often neglected by their families,  
85 particularly when being cared for by a non-parental adult, often sleeping on bare ground without a  
86 mosquito net, and fed once a day in exchange for heavy domestic duties such as water collection and  
87 laundering, in many cases with little protection from ongoing gender-based violence. This lack of  
88 adult care or support often leads to delays in care-seeking or complete lack of antenatal and delivery  
89 care, putting girls at high risk of death from undetected pre-eclampsia, untreated infections,  
90 anaemia, lack of birth preparation, and other common obstetric risks [4]. To achieve the Sustainable  
91 Development Goals target of reducing the maternal mortality rate to less than 70 per 100 000 live  
92 births by 2030, adolescent girls are a priority group [5-7].

93

94 These findings led a grassroots organisation, Lifeline Nehemiah Projects (LNP), to develop a holistic  
95 and locally designed community-based mentoring intervention, 2YoungLives (2YL), from pregnancy  
96 through to one-year post-birth for adolescent girls [8]. Mentors support mentees to take up  
97 antenatal care and hospital birth, re-establish family connections where this is safe and appropriate,  
98 run a small business, and return to education or start vocational training. They promote and model  
99 early health-seeking behaviour, and provide practical advice about childbirth, parenting and  
100 contraception. The 2YL scheme was developed in 2017 in a suburb of the capital, Freetown, and  
101 expanded to five new sites in 2018, 2019 and 2021. A formative evaluation compared outcomes of  
102 young girls pre-intervention with those of other women post 2YL intervention [9]. In the 2YL cohort  
103 of young women who had mentors there were no maternal deaths (0% vs 10%) and lower levels of  
104 perinatal mortality (6% vs 16%), and infant mortality (11% vs 26%). Nearly all women receiving the  
105 2YL intervention gave birth with a skilled birth attendant and breastfed for longer than 6 months;  
106 and more than two thirds were using contraception by the baby's first birthday, with no second

107 pregnancies. All of the 2YL young women successfully ran a small business with support from their  
108 mentor, allowing them to learn business skills, eat well throughout pregnancy and provide for their  
109 babies. They reported increased self-confidence, supportive peer relationships, and a high level of  
110 satisfaction with the mentoring scheme [9]. Subsequent anecdotal evidence is also showing that the  
111 community engagement strategy pursued as an integral part of the early implementation is  
112 influencing widely-held ingrained attitudes towards practices which perpetuate gender inequality  
113 such as school non-attendance in pregnancy and child marriage.

114  
115 Based on this preliminary data, the 2YL mentoring scheme is promising [10]. A theory of change was  
116 co-developed to understand how and why the 2YL intervention may work in adolescent girls in Sierra  
117 Leone. 2YL has potential to improve the health and wellbeing of girls and their babies and sustainably  
118 improve livelihoods. Relationship building, engagement and advocacy, educational, social, and  
119 economic empowerment, and respectful community engagement and involvement are important  
120 mechanisms of action to consider. However, more robust evidence is needed to understand the  
121 impact and mechanisms of how 2YL can address determinants of adolescent maternal mortality, and  
122 general health and wellbeing [10]. The overall aim of this study is therefore to assess the feasibility  
123 and implementation of the 2YL mentorship scheme in new communities in Sierra Leone to inform  
124 procedures for a subsequent fully powered cluster trial evaluating the effectiveness and social and  
125 economic impact of 2YL. Specifically, the study objectives include:

- 126 - To assess the integrity of study protocol including: recruitment, randomization procedure,  
127 data collection, retention procedures, acceptability, primary outcome measure to inform the  
128 sample size calculation, refinement of the intervention and training and supervision  
129 procedures.
- 130 - To assess pregnancy outcomes of adolescents receiving the 2YL intervention compared to  
131 those receiving usual care.
- 132 - To compare experiences of care, mentoring, health and wellbeing, and thriving among young  
133 women receiving the 2YL intervention compared to those receiving usual care.
- 134 - To evaluate the implementation, contextual factors and mechanisms of change of the 2YL  
135 intervention in order to understand the results and its potential impact.

136  
137

## 138 **Methods**

### 139 **Setting and study design**

140 Sierra Leone, a low-income West African country with a population of 8.8 million, has a very high  
141 maternal mortality rate and a high burden of communicable and non-communicable diseases. It  
142 struggles to achieve basic universal health coverage and access to potable water, sanitation and

143 hygiene [11]. Sexual violence and rape are common, and capacity to provide treatment to affected  
144 women and girls is extremely limited (State of Emergency over rape and sexual violence was declared  
145 in 2019) [12]. Sierra Leone also suffers an inadequacy of human resources for health; it has 2 skilled  
146 providers (doctors, nurses and midwives) per 10,000 population which is well below WHO's health  
147 workforce targets for UHC and Sustainable Development Goal of 23 [13]. Suboptimal maternal and  
148 child health care contributes to premature deaths, disability, and devastating spending in a country  
149 with an incipient financial crisis exacerbated by the 2014 Ebola epidemic (and further weakened  
150 during the ongoing COVID-19 epidemic and the global fuel and food instability in the wake of the war  
151 in Ukraine). Despite recent improvements, adolescents account for nearly half of all maternal deaths,  
152 and neonatal, infant and child mortality are also high; infants of mothers who die are up to 10 times  
153 more likely to die within their first two years, while infants born to adolescent mothers are also at  
154 increased risk of sickness and death [1,2]. Although healthcare services are free for pregnant women,  
155 lactating mothers, and children below the age of five, antenatal attendance, access to skilled birth  
156 attendants and facility deliveries are low, and quality service delivery is often poor with disparities in  
157 access and availability to appropriate assessment and intervention, with delays in delivery, escalation  
158 of care and emergency maternity care [14].

159  
160 The 2YL trial will run in the communities served by twelve peripheral healthcare units (PHUs); the  
161 clusters, representing a range of urban and rural settings in five of the administrative regions or  
162 districts of Sierra Leone. The design is a pragmatic hybrid pilot cluster-randomised controlled trial  
163 (cRCT) of the introduction of the 2YL mentoring adjunct to maternity care in Sierra Leone. The trial  
164 structure is based on the Medical Research Council's (MRC's) guideline for developing and evaluating  
165 complex interventions [15], and Curran and colleagues' hybrid type 2 effectiveness-implementation  
166 research design that place similar focus on assessing effectiveness of an intervention as well as how  
167 best to implement it [16]. The trial will be reported according to the Consolidated Standards of  
168 Reporting Trials (CONSORT) statement for randomised pilot and feasibility trials [17], the Standard  
169 Protocol Items: Recommendations for Interventional Trials (SPIRIT) statement [18] (S1 SPIRIT  
170 Checklist) as well as the Template for Intervention Description and Replication (TIDieR) checklist for  
171 intervention description [19]. The trial has been prospectively registered in the International  
172 Standard Randomised Controlled Trial Number Registry (ISRCTN32414369) and approved by ethics  
173 committee at King's College London UK (HR/DP-21/22-26320) and the Office of the Sierra Leone  
174 Ethics and Scientific Review Committee. The (SPIRIT) Figure adapted for the 2YL trial is shown below  
175 in Figure 1. Any protocol amendments will be notified to ethics committees and all collaborators  
176 informed.

177

178 **Eligibility criteria**

179 Eligibility criteria for the clusters is not having been previously exposed to the 2YL. All adolescent girls  
180 aged under 18 identified as pregnant in the community or presenting for maternity care at the  
181 selected clusters within the trial time frame will be included. There will be no exclusion criteria.

182

### 183 **Recruitment**

184 Twelve clusters, (each with named communities routinely served by peripheral health units), will be  
185 identified by local partners and invited to participate in the study by the local research staff.  
186 Institutional-level consent and relevant local approvals from district health authorities and hospitals  
187 on behalf of the cluster will be obtained at the start of the trial (time point zero), and prior to  
188 intervention implementation. Participants living in the twelve clusters will be recruited by trained  
189 data collectors and can be identified through community members and different registers (i.e.,  
190 antenatal, maternal and delivery register, referrals, outreach). In the event of changes to the PHUs  
191 serving a community during the study period (e.g. existing PHUs closing) we may invite a PHU to  
192 participate in the same randomised arm if it is serving the same community.

193

194 In intervention sites, pregnant adolescents can self-refer or be referred by a friend or family member  
195 who has heard about the mentoring scheme from community engagement activities. As per usual  
196 2YL practice, the local team coordinator will meet with eligible pregnant girls and enrol them into the  
197 mentoring scheme as they come forward to a maximum of 36 (maximum number of girls that  
198 mentors can support per cluster due to limited resources). This helps us to test the feasibility of the  
199 intervention in a pragmatic way while avoiding selection bias. At their 6 weeks routine postnatal  
200 appointment, girls in both arms will be given the option to individually enrol and participate in two  
201 sub-studies (e.g. qualitative interviews, photovoice), and for those agreeing to participate in the sub-  
202 studies, explicit written informed consent (including from parents or guardians) will be gained and  
203 will be contacted around six-nine months after birth. Adolescents return to the PHU at one year for  
204 their routine infant immunisations appointment. A flow chart for 2YL is presented in Figure 2.

205

### 206 **Randomisation**

207 The unit of randomisation is the trial area (or cluster), rather than the individual woman. The twelve  
208 clusters will be matched into pairs accounting for cluster size (births by adolescents) and distance  
209 from the referral hospitals. The clusters will be first allocated random cluster numbers and the  
210 sequence generation for receiving the 2YL intervention will then be determined by computer-  
211 generated random numbers by the trial statistician via a secure web-based randomisation and data  
212 management system hosted by MedSciNet with telephone back-up available at all times. The  
213 clusters will be masked until they are informed of their allocation two weeks prior to their  
214 implementation start date to give sufficient time for organizing community engagement activities,

215 leading to recruitment and training of mentors and coordinators. A minimisation algorithm will also  
216 be used to ensure balance between groups with respect to PHU use and distance to referral hospital.  
217 The nature of the 2YL intervention is such that blinding of girls, mentors or healthcare providers  
218 cannot be achieved. However, outcome assessment will be masked to the 2YL statistician and the  
219 researchers who will analyse the data.

220

## 221 **Interventions**

### 222 ***Intervention: 2YL + usual maternity care***

223 Clusters and participants in the intervention group will receive the different components of the 2YL  
224 mentoring intervention (provided as an adjunct to usual maternity care). The structure of the 2YL  
225 intervention is focused saving adolescents' lives and promoting their health and development.

226

227 Key roles: The intervention is run on the ground by a team from Lifeline Nehemiah Projects; with  
228 oversight from LNP's Executive Director, a CEI specialist who leads on the initial community  
229 engagement activities. The project manager, a gender specialist, leads on recruitment, training and  
230 supervision of mentor teams, with support from a lead coordinator, and administrative and finance  
231 assistance from the LNP team.

232

233 Community engagement and involvement (CEI): this is a core first component of the 2YL intervention.  
234 LNP has devised a CEI strategy with three trips to each site to pave the way for the acceptance and  
235 tailoring of the intervention, considering local contextual factors, understanding how communities  
236 operate, and engaging those who would bring out various perspectives. Listening, discussing, and  
237 connecting with communities is imperative to build trusting relationships, and more CEI activities are  
238 undertaken in a bespoke fashion, depending on the specific requirements of each community.

239

240 Recruitment and training of mentors: women with a passion to support vulnerable girls are identified  
241 during CEI activities and recruited as mentors in collaboration with community stakeholders based  
242 on their experience, availability, knowledge of the community, commitment to improve girls' lives  
243 and for having a reputation for kindness and being trustworthy. Each team also has a local  
244 coordinator who has the additional skill of literacy and record keeping allowing her to record details  
245 of activities and feed back to the central LNP team. Each site is scheduled to have a team of four  
246 mentors (and 1 local coordinator). Training and supervision: mentors and coordinators receive a 4-  
247 day manualised training programme using discussion, role play and bespoke pictorial maternal and  
248 newborn health knowledge and resources to learn and share important health messages and give  
249 practical support. The training emphasises the importance of commitment and confidentiality and is  
250 provided by an experienced educationalist with experience of training community members.



251 Ongoing support and supervision are provided to mentors by both their local coordinators and the  
252 LNP's 2YL central management team. Mentors and coordinators are all volunteers who receive a  
253 monthly stipend to cover out of pocket expenses.

254

255 Matching of mentor-mentees: Adolescent girls are recruited to 2YL at any stage of pregnancy, and  
256 receive the mentoring for one year after birth (regardless of pregnancy outcome). They are identified  
257 by mentors in their localities, often by the girl herself hearing about the mentoring scheme from a  
258 peer, and approaching the mentor, or by the mentor hearing of a teenage pregnancy and asking the  
259 girl if she would like to join the scheme. Geographical proximity and shared tribal language are taken  
260 in consideration for matching girls with mentors. A total of 3-4 girls are matched to one mentor who  
261 will work with the adolescent for the entire one-year period unless covering or changing a mentor if  
262 needed for any arising issues.

263

264 2YoungLives activities include: at least weekly face to face meetings between mentor and mentee  
265 where the mentee feels comfortable and confidential conversation is possible; promotion of health  
266 services uptake; reminding to attend or attending with mentee for usual antenatal care;  
267 accompanying mentee to health facility when in labour or needing emergency care (or ensuring other  
268 birth partner is available according to mentee's wishes); visits from mentor to mentee's family to  
269 advocate for family support, if safe and appropriate; flexible and practical support for pregnancy and  
270 parenthood dependent on mentee's support network; discussion with mentee to consider small  
271 business options and accompanying mentee to purchase first supply of goods; encouragement to  
272 return to school or start vocational training; a practical session making healthy baby food;  
273 encouragement to take up post-partum contraception; the importance of first line home treatment  
274 and early health-seeking behaviour for their baby; and an informal 'graduation' celebration at the  
275 end of the mentoring scheme. They also run monthly site meetings in the community with all mentors  
276 and mentees for peer support, cooking, eating and group discussion. At each of these sessions,  
277 visitors such as healthcare providers from local health facilities, teachers, other community members  
278 are invited for discussions about health topics or educational or training opportunities.

279

280 There are some aspects of the intervention that can be tailored depending on individual needs and  
281 circumstances; for example, if mentees are identified who have physical or intellectual disability, the  
282 team can enhance support with more visits and provide communication cards (for example for a deaf  
283 girl to use in labour) or by monitoring uptake of routine pregnancy medication (for girl with a learning  
284 disability). The whole team will always follow LNP's safeguarding policies.

285



286 Usual or routine maternity care is described below and will be the same in both intervention and  
287 control groups.

288

289 ***Control: usual maternity care***

290 The comprehensive care package will follow local and national guidelines for maternity care in Sierra  
291 Leone [20, 21]. Intervention packages prioritised under antenatal care are aligned to the 2016 WHO  
292 Antenatal model that recommends a minimum of eight antenatal contacts, with an overarching aim  
293 of providing pregnant adolescents or women with quality, respectful, individualised, person-centred  
294 care [22]. The latest Sierra Leone National Reproductive, Maternal, Newborn, Child and Adolescent  
295 Health Strategy outlines 1) interventions to be delivered under the antenatal care for positive  
296 pregnancy across the different service delivery levels, and 2) the priority for skilled birth attendance  
297 and essential newborn care all packaged under emergency obstetric and newborn care (EmONC)  
298 [20].

299

300

301 **Outcomes**

302

303 ***Primary feasibility outcomes:***

304 Eligibility, recruitment, retention and attrition rates

305 Data collection and data completeness

306 Selection of most appropriate primary outcome measure and sample size calculation

307

308 ***Primary clinical outcome:***

309 The primary clinical outcome is a composite of maternal death (all-cause, occurring during  
310 pregnancy, labour, or within 42 days of birth), stillbirth (born with no signs of life at or after 28 weeks  
311 of pregnancy, but before or during birth) and neonatal death (deaths among live births during the  
312 first 28 days). We will report the effect of the 2YL intervention on both the composite and its  
313 components for all woman/baby deaths in the study; those who experience any one of the  
314 components will be considered to have experienced the composite outcome. Evaluating the data  
315 collection strategy and tool is an important element of testing the feasibility of a larger trial; for  
316 example, whether collecting outcome data up to six weeks postnatally is possible due to the mobility  
317 of this population.

318

319 ***Secondary clinical and process outcomes***

320 Secondary maternal outcomes will include intermittent preventive therapy for malaria, anaemia,  
321 tetanus toxoid immunizations, caesarean sections, blood transfusions, birth at facility, sepsis,

322 postpartum haemorrhage, place of birth and attendant, and uptake of contraception. Secondary  
323 perinatal outcomes will include; gestational age, birthweight, Apgar score, resuscitation, immediate  
324 breastfeeding, Kangaroo mother care, six weeks postnatal immunisation uptake, infant mortality.

325

326 Other secondary process and implementation outcomes will include service use, processes and  
327 implementation outcomes including; antenatal checks, antenatal checks with blood pressure  
328 measurement, referrals, postnatal check within a week of birth; measures of fidelity (e.g., mentors  
329 and team coordinators recruited, training packages and workshops, weekly one to one meetings,  
330 monthly social gatherings), acceptability (e.g. satisfaction with different components of the  
331 intervention among young girls, mentors, healthcare providers and local stakeholders), reach,  
332 adoption, women's experiences of mentoring and care (e.g., respectful care access, trust, system  
333 responsiveness, quality and safety, attitude to and uptake of contraception in the postnatal year) *and*  
334 economic and social progress/wellbeing measures (e.g., return to education, experiences of running  
335 small businesses, perspectives of thriving), mechanisms of change (e.g., access to care, advocacy,  
336 support, respectful care, engagement, referral and escalation, health promotion, empowerment,  
337 relationships) and for social and economic wellbeing (e.g., social and economic empowerment, self-  
338 confidence, sense of agency, trustworthy adult and peers, respectful community engagement with  
339 families).

340

#### 341 **Sample size**

342 Sample size estimation has been provided by the 2YL trial statistician. Based on experience with  
343 some of the proposed trial areas and global maternal health literature relevant to these settings [4-  
344 7], we estimate the risk to adolescent pregnant women in Sierra Leone of experiencing a primary  
345 outcome (one of maternal death or stillbirth or neonatal death with no double counting) to be  
346 approximately 20% of all adolescent women. We also estimate a modest intra-cluster correlation  
347 (ICC) of 0.02 (sites similar but not identical, and a simple exchangeable autocorrelation structure  
348 based on previous experience in Sierra Leone) [23].

349

350 Prior to full proposal development, the 2YL team visited communities served by a typical PHU similar  
351 in size and distance to referral hospital to trial sites. At least 16% of all deliveries among teens had  
352 resulted in maternal death, stillbirth, or early neonatal death. It was not possible to include late  
353 neonatal deaths up to 28 days. In addition, girls who were referred to a referral hospital in an  
354 emergency were not included in these numbers. We believe that this data could match the indicative  
355 estimate of 20% of girls experiencing a primary outcome.

356

357 This study is planned as a pilot, with the main stated aim to demonstrate the feasibility of a fully  
358 powered study, and to help with its design. But for the purpose of the power calculation (intention  
359 to treat and not per protocol), an assumption of at least 42 deliveries per site has been made, with  
360 20% having primary outcome composite events during the trial duration. These numbers will provide  
361 84% power to detect a 52% relative risk reduction (RRR) of the primary outcome (from 20% to 9%)  
362 assuming a models ICC 0.02.

363

#### 364 **Data collection**

365 Primary and secondary pregnancy outcome

366 Primary and secondary pregnancy outcome data will be recorded over the study period and will be  
367 collected at an individual level from study-specific and routine data collection tools (e.g., antenatal  
368 attendance register, birth register, referral and outreach registers, 6-week postnatal check  
369 appointment book, hospital registers). At some PHUs, an additional 'adolescent book' is in use to  
370 record ANC registration of under-18-year-olds and associated birth outcomes. Data collection at both  
371 intervention and control clusters will be done by local data collectors who will enter the data  
372 anonymised onto MedSciNet, the study-specific management system.

373

374 Process Evaluation: experiences and implementation

375 In line with the current best practice in implementation research, the team will undertake a process  
376 evaluation to understand variations in the impact of the intervention on outcomes of interest and to  
377 contextualise findings. This will draw on the six core elements considered in the updated NIHR/MRC  
378 framework for evaluating complex interventions which include: interactions between intervention  
379 and context, theorising how the intervention may work, diversity of stakeholder's perspectives in  
380 research, uncertainties, refinement of the intervention and resource and outcome consequences of  
381 the intervention [15]. A mixed methods approach will be used to assess implementation outcomes  
382 and identification of mechanisms and contextual factors that may influence variation in outcomes  
383 and experiences across multiple stakeholder groups, and at different stages of implementation. This  
384 offers a 360-degree evaluation, which considers needs and perspectives that typically differ between  
385 stakeholder groups and can vary over time.

386

387 Both quantitative and qualitative data on processes, experiences and implementation will be  
388 collected from monthly checklists, separate focus groups with a purposive sample of mentors, PHU  
389 healthcare providers and community stakeholders, and semi-structured interviews with some HCPs,  
390 community leaders, regional and national stakeholders, and adolescent girls in control and  
391 intervention sites. If appropriate, a family member or a friend will also be invited to participate in an  
392 interview. Girls will be offered the opportunity to be one-to-one (interviewer and participant) or one-

393 to-two (interviewer and participant with chosen family members/friend). Thus, if appropriate, the  
394 family member/friend can be invited to the interviews, as social support is culturally patterned and  
395 could play an important part in the mechanisms of the intervention, particularly in women's  
396 engagement with care. Wellbeing measures will include, for example, the adolescent flourishing scale  
397 [24] and a girl's empowerment tool based on existing guides for impact evaluations [25]. A small  
398 sub-group of girls will also be invited to take part in the photovoice project, a participatory research  
399 methodology developed by Wang and Burrit [26] that partners with participants to use photography  
400 to help them to record, reflect upon, critically dialogue and share knowledge about their perspectives  
401 and priorities to reach policy makers, foster social change and strengthen partnerships [27].

402

### 403 **Statistical analysis**

404 We will undertake two statistical analyses: the main pragmatic, intention to treat analysis (ITT) to  
405 compare intervention and control clusters that include all adolescent girls as originally allocated after  
406 randomisation; and a complementary per protocol (PP) analysis to compare intervention and control  
407 clusters that includes only those girls who received the intervention originally allocated. The  
408 CONSORT guidelines for reporting of parallel group RCTs recommend that both ITT and PP analyses  
409 should be reported for all planned outcomes to allow readers to interpret the effect of an  
410 intervention. It is not possible to blind clusters to interventions they receive, but outcome  
411 assessments will be blinded.

412

413 The main analysis will use a permutation test designed for stepped-wedge trials [28] to adjust the  
414 standard errors, confidence intervals and significance tests for clustering. This gives equal weight to  
415 each woman included in the study. We will adjust for important baseline differences that might be  
416 related to outcomes (e.g. parity, gestation at first antenatal visits). As individual-specific data will be  
417 used there is a potential for missing data; but the main impact of missing data would be to invalidate  
418 the randomised comparison if there was unequal dropout between the two arms, leading to  
419 potential bias. Multiple regression, as described, would correct for any such bias.

420

421 Qualitative data from interviews and focus group discussions will be mainly analyzed using thematic  
422 analysis [29]. In brief, this includes familiarisation with the data, generation of initial codes, the  
423 searching for and review of themes, naming and offering explanations for each theme, and lastly  
424 producing a report. This practical analytic approach involves inductive coding practices which are  
425 both consultative and initially open, and thus helpful to explore the perspectives of different research  
426 participants, highlighting similarities and differences, and generating unanticipated insights [29].  
427 Implementation and contextual factors (barriers and facilitators) will be further assessed using the  
428 Consolidated Framework for Implementation Research [30] and Proctor's framework [31,32]. A

429 secondary grounded theory analysis will be undertaken to generate theory to explore and explain  
430 the phenomenon of adolescent pregnancy in Sierra Leone [33].

431  
432 Implementation costs are important in process evaluations, and we will assess the feasibility of health  
433 economics for 2YL. It would not be appropriate to conduct a full economic evaluation for a pilot study  
434 designed to estimate the parameters needed to design a future definitive trial. Thus, the focus of  
435 health economics in this pilot trial will be limited to developing or refining service use schedules and  
436 other measures of outcomes. We will explore the resource use associated with the mentoring  
437 scheme and savings or other service use impacts and will also estimate costs associated with the  
438 delivery of the mentoring scheme. Cost consequences analyses will be used to present the results  
439 from this pilot study, as the costs and effects observed can also be used in value of information  
440 modelling to determine whether the cost of a definitive trial is worthwhile.

441  
442 **Data management and monitoring**

443 Anonymised data will be collected by the local data collectors, under the supervision of the trial  
444 manager. All participants will be given a unique identifier and no personal information will be entered  
445 onto the secure, online trial database (MedSciNet). Where possible, all anonymised data will be  
446 collected directly onto MedSciNet, but if exceptional circumstances make this not possible (e.g. no  
447 internet and very remote PHUs), a paper-based data collection tool will be used and stored  
448 anonymously in secure areas of each health facility and of the implementation partners. All data  
449 uploaded on the MedSciNet database will be automatically stored and backed up. Data collection  
450 and storage will be governed by the UK Data Protection Act 1998. All MedSciNet data is stored on  
451 high-capacity servers kept in highly secure monitoring and surveillance systems.

452  
453 The MedSciNet database will be accessible for at least one year following the end of the trial, and a  
454 copy of this will then be kept on the KCL Server for 20 years, in accordance with the KCL Data  
455 retention schedule. Informed consent forms for qualitative components of the trial will be kept in  
456 files in secure areas of the management team (Lifeline Nehemiah Projects). Only the research  
457 assistant and the local and UK based managers will have access to these. All paper forms will be  
458 stored securely and kept in confidence in compliance with the UK Data Protection Act 1998.

459  
460 The local research team will work in collaboration with the local community workforce and current  
461 local initiatives, to avoid missing primary outcome events. A flexible approach will be used to  
462 individualize our methodology according to local capacity and community healthcare workforce  
463 infrastructure. Consistency and quality of source data will be monitored by a research assistant and  
464 the Chief Investigators. MedSciNet allows for extensive monitoring and query processing features, as

465 well as a comprehensive alerting system to identify missing data. Fields including ‘limits’ will be used  
466 to avoid entry of erroneous data. The 2YL management team will regularly conduct data monitoring  
467 visits to perform validation checks to verify validity and completeness of at least 10% of the source  
468 data. The team will also review the audit trail at individual levels if necessary. Training in the trial  
469 protocol will be delivered centrally (before trial recruitment) and on site in the field, to ensure local  
470 research staff are confident and competent to collect outcome data and ensure its quality, accuracy,  
471 and completeness. The final datasets used and/or analysed during the study will be made available  
472 from the corresponding author upon reasonable request.

473

#### 474 **Trial oversight**

475 This study will be supported by a trial management group (TMG) that includes research fellows,  
476 research assistants, data collectors, a 2YL programme manager and trial coordinator who will run the  
477 implementation and provide organisational support, particularly to the data collectors and teams in  
478 the field. The TMG will meet every week, with all co-investigators meeting every two-three months  
479 to monitor and review progress, troubleshoot and for strategic planning. This TMG reports to the  
480 steering committee, which is part of a wider international advisory group that oversees all activities  
481 of the different workstreams of the global health research group. The group will include dependent  
482 and independent members who will be invited to attend, at least, annual oversight meetings.

483

#### 484 **Dissemination**

485 Findings, positive or negative, will be disseminated in international peer-reviewed journals, as well  
486 as local, national and international events, workshops and conferences. Whenever possible, girls and  
487 their mentors, healthcare providers and community members and stakeholders will be provided with  
488 a layperson’s summary of the results, and government and policy makers will also be informed.

489

490

#### 491 **Discussion**

492 Sierra Leone has one of the highest maternal mortality rates in the world (717 deaths per 100 000  
493 livebirths in 2019), and this burden falls primarily on adolescent girls. They are 40-60% more likely to  
494 die during childbirth and their infants are also at increased risk of sickness and death [1-2]. More than  
495 two thirds of all maternal deaths are caused by haemorrhage, hypertension and sepsis, and about a  
496 third are due to unsafe abortions among adolescents [2]. Many of these deaths could be prevented  
497 with simple, cost-effective and available interventions, but unfortunately there are often inequities  
498 in availability, access and quality of care, and delays in delivery, escalation and referral in Sierra Leone  
499 [14]. Adolescent girls are a particularly vulnerable group, often from disadvantaged communities and  
500 usually driven by poverty, lack of education and employment opportunities [1,2]. Stigma and

501 abandonment, lack of family-based support and delayed care-seeking have been found to be  
502 important contributors to maternal adolescent mortality [4]. Social complexities and high rates of  
503 child marriage, adolescent pregnancy and gender-based violence (39%, 28%, and ~50% respectively)  
504 also prevent girls from realizing their full potential in all aspects of their development [34,35].

505

506 The country has a very young population (nearly 65% are under 25 years old) [36], and improving  
507 health and wellbeing of these girls (including sexual and reproductive health) remains a top priority,  
508 indicated by a number of government policies targeted to this group: the Free Health Care Initiative  
509 for pregnant and breastfeeding women (2010), the National Standards for Adolescent and Young  
510 People Friendly Health Services (2011), the Reproductive, Maternal, Newborn, Child and Adolescent  
511 Health Policy (2017-2021); the National strategy for the reduction of adolescent pregnancy and child  
512 marriage 2018-2022 (2018), and the National Policy for Radical Inclusion in Schools (2021). The  
513 development of the first multi-agency and cross-ministry National Strategy for the Reduction of  
514 Teenage Pregnancy (2013-2015) was impeded by the scarcity of resources and diversion of efforts to  
515 the Ebola epidemic which also increased rates of adolescent pregnancy. However, in the aftermath  
516 of the epidemic, a revision and update of the national strategy was relaunched in 2018 which  
517 included child marriage [37].

518

519 Much of the attention has been given to primary prevention of adolescent pregnancy and child  
520 marriage, but adolescent girls are still getting pregnant and dying during childbirth. It is imperative  
521 to also identify programmes or interventions that support them during pregnancy and the parenting  
522 period so they can survive and improve their health and development and that of their child. To  
523 support and facilitate the integration of pregnant and parenting girls it is crucial to sensitise  
524 communities, strengthen existing youth friendly services and work closely with stakeholders  
525 (government, gatekeepers, community and family actors). It is now widely recognized that the need  
526 to support a holistic agenda where integration and implementation of evidence-based interventions  
527 across health, education, and social systems must improve in order to protect, nurture, and support  
528 the health and development potential for every child and adolescent [38].

529

530 These are the philosophical principles by which the 2YL community-based mentoring intervention  
531 was initially developed in 2017. Mentored adolescent girls are supported to thrive, not just survive.  
532 Youth mentoring programmes have been shown to improve outcomes across academic, behavioral,  
533 emotional and social areas of young people's lives. At present there is no clear evidence that they  
534 can improve physical health, although studies are limited (including for pregnant and parenting  
535 adolescents) [39,40]. The evidence suggests that longer mentoring relationships are linked to better  
536 outcomes, and the role of the matching process, the training and motivation, and the need for goal-



537 orientated programmes are keys for success [39]. Goldner and Ben-Eliyahu [41] tried to unpack the  
538 relational processes in community-based youth mentoring which promote high relationship quality  
539 and generate the most significant benefits. They found that long enough, supportive, reliable,  
540 trustworthy, and balanced mentoring relationships (clearly articulated goals, structure, and  
541 behaviours) serve as building blocks in promoting mentees' development and minimising adversity.  
542 In addition, consideration needs to be given to moderating factors (i.e. mentors', mentees' and  
543 matching characteristics), highlighting the need for more research in this area [41]. Although the 2YL  
544 mentoring scheme has been piloted in five sites over four years with promising results, a more robust  
545 and formal evaluation is needed to understand the feasibility of 2YL in other communities and how  
546 it can address determinants of adolescent maternal mortality and general health and wellbeing, and  
547 this is what the 2YL pilot trial is aiming to achieve.

548  
549 Since 2021, 2YL has been part of a Global Health Research Group (CRIBS) funded by the UK's National  
550 Institute for Health and Care Research and led by the University of Sierra Leone and King's College  
551 London in collaboration with multiple partners, including the Sierra Leone Ministry of Health and  
552 Sanitation, Lifeline Nehemiah Projects (LNP), NGO Welbodi Partnership, the National Emergency  
553 Medical Services (NEMS), and the national Midwifery Schools. The group, which will run for 3 years,  
554 aims to develop and implement simple, scalable innovations to reduce maternal (including  
555 adolescent) and perinatal mortality and build research capacity and expertise in Sierra Leone [42].  
556 The group is uniquely multidisciplinary with expertise in reproductive health, obstetrics and  
557 gynecology, nursing, midwifery, public health, gender studies, sociology, implementation science,  
558 medical statistics, health policy and economics.

559  
560 We believe findings from the 2YL pilot trial will provide more holistic information for communities  
561 and local and national decision-makers and refine procedures to inform future scale-up work aiming  
562 to reduce mortality among adolescent girls and their babies, and improving their health, educational  
563 and socio-economic welfare. The various programmes implemented by the line ministries in Sierra  
564 Leone are more institutionally based with little active involvement with communities that would  
565 serve to support prevention and sustainability; one of the unique features of the 2YL model is the  
566 meaningful community engagement and involvement. There has been national and international  
567 interest in 2YL which has been featured in the Lancet [10], the 2022 UNFPA State of the World  
568 Population Report [43], a programme for the BBC World Service 'People fixing the World' [44] and  
569 the Evening Standard [45]. We believe 2YL has the potential to save lives and promote health and  
570 wellbeing of adolescent girls and babies, and thus become a model of good practice for adolescent  
571 pregnancy, to be adopted more widely in Sierra Leone and elsewhere.

572

573 **Supplementary information**

574 No data are available.

575

576 **Trial status**

577 The current 2YL protocol is version 2.1, 21 July 2023. Recruitment start time was 4 July 2022;  
578 completion is 30 November 2023.

579

580 **Abbreviations**

581 2YL: 2YoungLives; cRCT: cluster randomised controlled trial; CONSORT: Consolidated Standards of  
582 Reporting Trials; EmONC: Emergency Obstetric and Newborn care; ICC: Intra-Cluster Correlation;  
583 ISRCTN: International Standard Randomised Controlled Trial Number; KCL: King's College London;  
584 PHU: Peripheral Health Unit; SL: Sierra Leone; SPIRIT: Standard Protocol Items: Recommendations  
585 for Interventional Trials; TMG: Trial Management Group; TIDieR: Template for Intervention  
586 Description and Replication; WHO: World Health Organization.

587

588

589 **Declarations**

590

591 **Funding**

592 This study has undergone full external peer review as part of the funding process. This research is  
593 funded by the National Institute for Health and Care Research (NIHR) (ID: NIHR33232) using UK aid  
594 from the UK Government to support global health research. JS and CFT are supported by the NIHR  
595 Applied Research Collaboration (ARC) South London. JS is a NIHR Senior Investigator and CFT is  
596 supported by a NIHR Development and Skills Award (ID: NIHR301603). The views expressed in this  
597 publication are those of the author(s) and not necessarily those of the NIHR or the UK Government.  
598 (<https://fundingawards.nihr.ac.uk/award/NIHR133232>)

599

600 **Competing interests**

601 We declare no competing interests.

602

603 **Availability of data and Material:**

604 No data are available yet.

605

606 **Authors' contributions**

607 LN, MK, PTW are the co-founders of 2YL. CFT, LN, MK drafted the initial trial protocol, and PK, AMK,  
608 AR, ST, PTS, AHS, JS and PTW reviewed and commented on the initial draft and/or on subsequent  
609 revisions. All authors have seen and approved the final version of the manuscript.

610

#### 611 **Ethical approval and consent to participate**

612 This study has been approved by ethics committee at King's College London UK (HR/DP-21/22-26320)  
613 and the Office of the Sierra Leone Ethics and Scientific Review Committee. Data security will be  
614 maintained in accordance with General Data Protection Regulations. Written, informed consent to  
615 participate will be obtained from all participants for qualitative interviews, focus group discussions,  
616 and photovoice.

617

#### 618 **Consent to publication**

619 This manuscript does not contain individual personal data from participants.

620

#### 621 **Acknowledgements**

622 We thank all members of CRIBS Group & collaborators at the University of Sierra Leone, King's College  
623 London; Ministry of Health and Sanitation; Schools of Midwifery; Welbodi Partnership; NEMS; PCMH;  
624 UNICEF; WHO SL. Special thank you to CRIBS research assistants and data collectors working for 2YL,  
625 as well as all the girls, mentors, relatives, healthcare providers and community stakeholders.

626

#### 627 **Name and contact information for sponsor**

628 King's College London (Professor Reza Razavi, [reza.razavi@kcl.ac.uk](mailto:reza.razavi@kcl.ac.uk))

629

#### 630 **Role of sponsor**

631 The study is sponsored by King's College London (KCL). However, this is an investigator initiated  
632 clinical trial, therefore the sponsor played no role in the design of the study and collection, analysis,  
633 and interpretation of data and in writing the manuscript.

634

635

636

637

638

639

640

641

642

## 643 **References**

- 644 1. WHO, UNICEF, UN Population Fund, World Bank Group and the United Nations Population  
645 Division. Maternal mortality: levels and trends 2000 to 2017. Geneva: World Health  
646 Organization, 2019.
- 647 2. Maternal death surveillance and response Annual Report. A call for action, time to respond.  
648 Ministry of Health & Sanitation, Directorate of Reproductive and Child Health, Sierra Leone.  
649 2019.
- 650 3. UNFPA, National strategy for the reduction of adolescent pregnancy and child marriage, 2018-  
651 2022. [https://reliefweb.int/sites/reliefweb.int/files/resources/SLE\\_country%20 profile.pdf](https://reliefweb.int/sites/reliefweb.int/files/resources/SLE_country%20profile.pdf)  
652 (accessed Feb 22, 2022).
- 653 4. November L, Sandall J. 'Just because she's young, it doesn't mean she has to die': exploring the  
654 contributing factors to high maternal mortality in adolescents in Eastern Freetown; a qualitative  
655 study. *Reprod Health* 2018; 15: 31.
- 656 5. Vogel JP, Pileggi-Castro C, Chandra-Mouli V, et al. Millennium development goal 5 and  
657 adolescents: looking back, moving forward. *Arch Dis Child* 2015;100 Suppl 1:S43–7
- 658 6. Nove A, Matthews Z, Neal S, et al. Maternal mortality in adolescents compared with women of  
659 other ages: evidence from 144 countries. *Lancet Glob Health* 2014;2:e155–64.
- 660 7. Li, Zihui, et al. "Maternal healthcare coverage for first pregnancies in adolescent girls: a  
661 systematic comparison with adult mothers in household surveys across 105 countries, 2000–  
662 2019." *BMJ Global Health* 5.10 (2020): e002373.
- 663 8. <https://2younglives.org/>
- 664 9. Kamara M, November L. 2 Young Lives: mentoring teenagers for safer pregnancy and birth;  
665 Project report 2020. 2 Young Lives website. June 2020. Accessed October 05, 2021.  
666 <https://2younglives.org/wp-content/uploads/2020/07/2YL-2020-report-final.pdf>
- 667 10. Fernandez Turienzo C, November L, Kamara M, Kamara P, Goodhart V, Ridout A. et al.  
668 Innovations to reduce maternal mortality and improve health and wellbeing of adolescent girls  
669 and their babies in Sierra Leone. *The Lancet Child & Adolescent Health*. 2023 Mar 1;7(3):151-3.
- 670 11. ICF. SSL (Stats S and. Sierra Leone. Sierra Leone Demogr Heal Surv 2019. 2019;9:187–93.
- 671 12. BBC World. Sierra Leone declares emergency over rape and sexual assault. Available from:  
672 <https://www.bbc.co.uk/news/world-africa-47169729> (Accessed 19 September 2023)
- 673 13. The National health Workforce Accounts database, World Health Organization, Geneva  
674 2022. Available from: <https://apps.who.int/nhwaportal>,  
675 <https://www.who.int/activities/improving-health-workforce-data-and-evidence>
- 676 14. UNICEF. Maternal and newborn health disparities, Sierra Leone.  
677 [https://reliefweb.int/sites/reliefweb.int/files/resources/SLE\\_country%20 profile.pdf](https://reliefweb.int/sites/reliefweb.int/files/resources/SLE_country%20profile.pdf) (accessed  
678 June 22, 2023).

- 679 15. Skivington K, Matthews L, Simpson SA, Craig P, Baird J, Blazeby JM, et al. A new framework for  
680 developing and evaluating complex interventions: update of Medical Research Council  
681 guidance. *bmj*. 2021 Sep 30;374.
- 682 16. Curran GM, Bauer M, Mittman B, Pyne JM, Stetler C. Effectiveness-implementation hybrid  
683 designs: combining elements of clinical effectiveness and implementation research to enhance  
684 public health impact. *Medical care*. 2012 Mar;50(3):217.
- 685 17. Eldridge SM, Chan CL, Campbell MJ, Bond CM, Hopewell S, Thabane L, Lancaster GA. CONSORT  
686 2010 statement: extension to randomised pilot and feasibility trials. *bmj*. 2016 Oct 24;355.
- 687 18. Chan AW, Tetzlaff JM, Gøtzsche PC, Altman DG, Mann H, Berlin JA, et al.. SPIRIT 2013  
688 explanation and elaboration: guidance for protocols of clinical trials. *Bmj*. 2013 Jan 9;346.
- 689 19. Hoffmann T, Glasziou P, Boutron I, Milne R, Perera R, Moher D, Altman D, Barbour V,  
690 Macdonald H, Johnston M, Lamb S, Dixon-Woods M, McCulloch P, Wyatt J, Chan A, Michie S.  
691 Better reporting of interventions: template for intervention description and replication (TIDieR)  
692 checklist and guide. *BMJ*. 2014;348:g1687.
- 693 20. Ministry of Health and Sanitation. Sierra Leone National Reproductive, Maternal, Newborn,  
694 Child and Adolescent Health Strategy 2017–2021. Sierra Leone: Ministry of Health and  
695 Sanitation. 2017.
- 696 21. Ministry of Health and Sanitation. Sierra Leone basic package of essential health services 2015-  
697 2020.
- 698 22. . World Health Organisation. WHO recommendations on antenatal care for a positive  
699 pregnancy experience. Geneva: WHO, 2016
- 700 23. Vousden N, Lawley E, Nathan HL, Seed PT, Gidiri MF, Goudar S, Sandall J, Chappell LC, Shennan  
701 AH, Kachinjika M, Bukani D. Effect of a novel vital sign device on maternal mortality and  
702 morbidity in low-resource settings: a pragmatic, stepped-wedge, cluster-randomised controlled  
703 trial. *The Lancet Global Health*. 2019 Mar 1;7(3):e347-56.
- 704 24. Waigel NC, Lemos VN. A systematic review of adolescent flourishing. *Europe's Journal of*  
705 *Psychology*. 2023 Feb;19(1):79.
- 706 25. Glennerster R, Walsh C, Diaz-Martin L. A practical guide to measuring women's and girls'  
707 empowerment in impact evaluations. Gender Sector, Abdul Latif Jameel Poverty Action Lab.  
708 2018 Nov 28.
- 709 26. Wang C, Burris MA. Photovoice: concept, methodology, and use for participatory needs  
710 assessment. *Heal Educ Behav*. 1997;24:369-87.
- 711 27. Budig K, Diez J, Conde P, Sastre M, HernV^n M, Franco M. Photovoice and empowerment:  
712 evaluating the transformative potential of a participatory action research project. *BMC public*  
713 *health*. 2018 Dec;18(1):1-9.

- 714 28. Thompson J, Davey C, Hayes R, Hargreaves J, Fielding K. Permutation tests for stepped-wedge  
715 cluster-randomized trials. *The Stata Journal*. 2019;19(4):803-19.
- 716 29. Braun V, Clarke V. *Thematic analysis*. American Psychological Association; 2012.
- 717 30. Damschroder LJ, Reardon CM, Widerquist MA, Lowery J. The updated Consolidated Framework  
718 for Implementation Research based on user feedback. *Implementation science*. 2022  
719 Dec;17(1):1-6.
- 720 31. Proctor E, Silmere H, Raghavan R, Hovmand P, Aarons G, Bunger A, Griffey R, Hensley M.  
721 Outcomes for implementation research: conceptual distinctions, measurement challenges, and  
722 research agenda. *Administration and policy in mental health and mental health services*  
723 research. 2011 Mar;38:65-76.
- 724 32. Proctor EK, Bunger AC, Lengnick-Hall R, Gerke DR, Martin JK, Phillips RJ, Swanson JC. Ten years  
725 of implementation outcomes research: a scoping review. *Implementation Science*. 2023  
726 Dec;18(1):1-9.
- 727 33. Strauss A and Corbin. *Basics of qualitative research: Grounded theory procedures and*  
728 *technique*. 2nd ed. Newbury Park: Sage, 1998
- 729 34. UNICEF. Ending child marriage and teenage pregnancy in Sierra Leone. [https://](https://reliefweb.int/sites/reliefweb.int/files/resources/SLE_country%20profile.pdf)  
730 [reliefweb.int/sites/reliefweb.int/files/resources/SLE\\_country%20profile.pdf](https://reliefweb.int/sites/reliefweb.int/files/resources/SLE_country%20profile.pdf) (accessed June 22,  
731 2022).
- 732 35. UN Population Fund. Country profile Sierra Leone. [https://reliefweb.int/](https://reliefweb.int/sites/reliefweb.int/files/resources/SLE_country%20profile.pdf)  
733 [sites/reliefweb.int/files/resources/SLE\\_country%20profile.pdf](https://reliefweb.int/sites/reliefweb.int/files/resources/SLE_country%20profile.pdf) (accessed September 12, 2023).
- 734 36. Sierra Leone 2015 statistics child, adolescent and youth  
735 report [https://www.statistics.sl/images/StatisticsSL/Documents/Census/2015/sl\\_2015\\_phc\\_the](https://www.statistics.sl/images/StatisticsSL/Documents/Census/2015/sl_2015_phc_the_matic_report_on_children_adolescents_and_youth.pdf)  
736 [matic\\_report\\_on\\_children\\_adolescents\\_and\\_youth.pdf](https://www.statistics.sl/images/StatisticsSL/Documents/Census/2015/sl_2015_phc_the_matic_report_on_children_adolescents_and_youth.pdf) (accessed June 22, 2022).
- 737 37. Ministry of Health and Sanitation, Government of Sierra Leone. *National Strategy for the*  
738 *reduction of adolescent pregnancy and child marriage 2018-2022*. Government of Sierra Leone,  
739 2018.
- 740 38. Bhutta ZA, Boerma T, Black MM, Victora CG, Kruk ME, Black RE. *Optimising child and adolescent*  
741 *health and de*
- 742 39. Raposa EB, Rhodes J, Stams GJ, Card N, Burton S, Schwartz S, Sykes LA, Kanchewa S, Kupersmidt  
743 J, Hussain S. The effects of youth mentoring programs: A meta-analysis of outcome studies.  
744 *Journal of youth and adolescence*. 2019 Mar 15;48:423-43.
- 745 40. Armitage H, Heyes K, O'Leary C, Tarrega M, Taylor-Collins E. (2020) *What Makes for Effective*  
746 *Youth Mentoring Programmes: A rapid evidence summary*. Nesta: Manchester Metropolitan  
747 University.

- 748 41. Goldner L, Ben-Eliyahu A. Unpacking community-based youth mentoring relationships: An  
749 integrative review. *International journal of environmental research and public health*. 2021  
750 May 25;18(11):5666.
- 751 42. <https://cribs-i.org> (Accessed 14 September 2023)
- 752 43. UNFPA. State of World Population 2022: Seeing the Unseen: The Case for Action in the  
753 Neglected Crisis of Unintended Pregnancy (Page 49) Available from:  
754 [https://www.unfpa.org/sites/default/files/pub-pdf/EN\\_SWP22%20report\\_0.pdf](https://www.unfpa.org/sites/default/files/pub-pdf/EN_SWP22%20report_0.pdf) (Accessed 14  
755 September 2023)
- 756 44. BBC World Service 'People fixing the World'' Helping teenagers become good mums. Available  
757 from: <https://www.bbc.co.uk/programmes/p0c8jwj8> (Accessed 14 September 2023)
- 758 45. Evening Standard: Sierra Leone's pregnant teens matched with mentors to save their lives.  
759 Available from [https://www.standard.co.uk/optimist/let-girls-learn/sierra-leone-pregnant-  
760 teenagers-sex-mentors-childbirth-education-b1058657.html](https://www.standard.co.uk/optimist/let-girls-learn/sierra-leone-pregnant-teenagers-sex-mentors-childbirth-education-b1058657.html) (Accessed 14 September 2023)





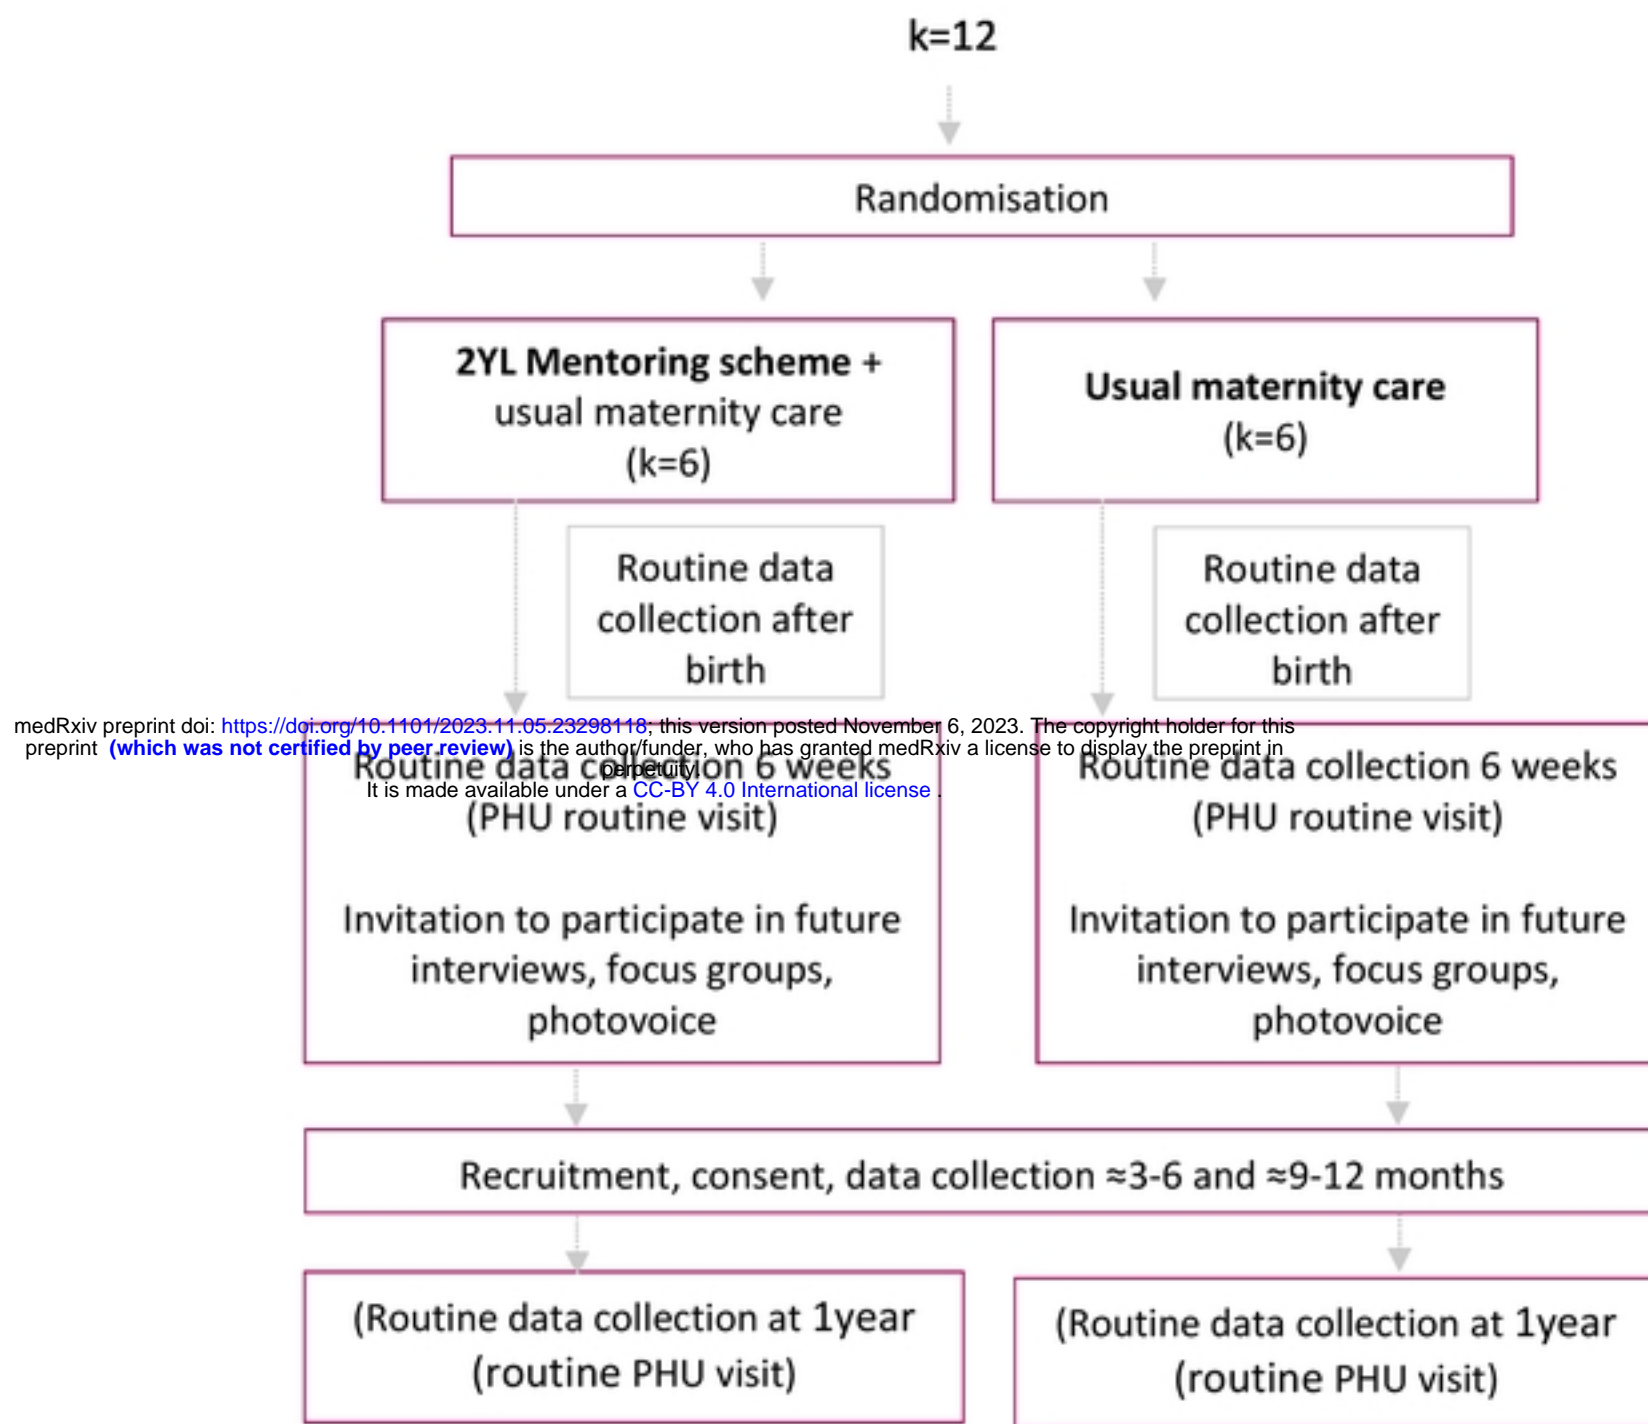

Figure 2. 2YL pilot trial flowchart
